# Supplementary material for: Cvm1 is a component of multiple vacuolar contact sites required for sphingolipid homeostasis
Source: PubMed Central journal article supplement — J Cell Biol. 2022 Jun 29;221(8):e202103048. doi: 10.1083/jcb.202103048 (PMC9247719; doi:10.1083/jcb.202103048), 2022-06-29

Source Data - Figure 2

E

Purified vacuoles

MW  
(KDa)

wt TEF1<sup>pr</sup>  
-CVM1

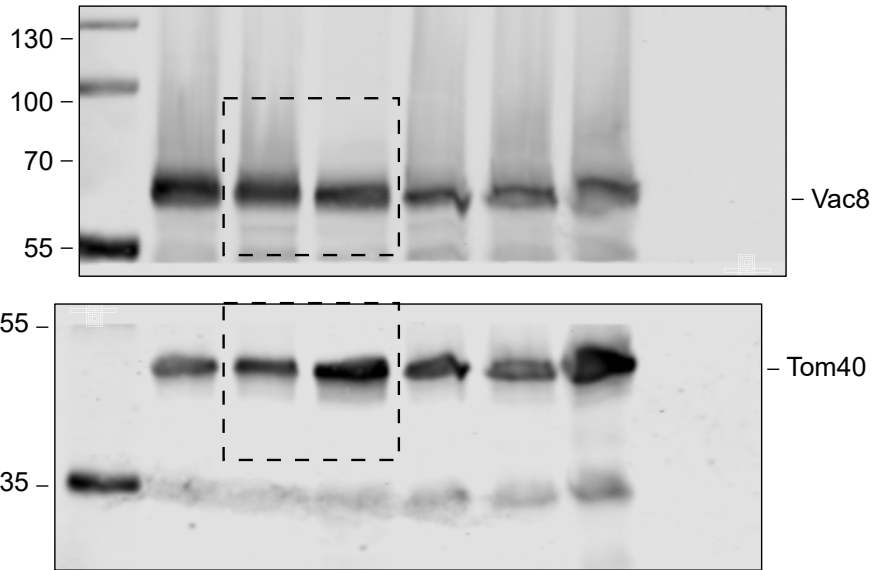

F

Purified vacuoles

WT *cvm1* $\Delta$

MW  
(KDa)

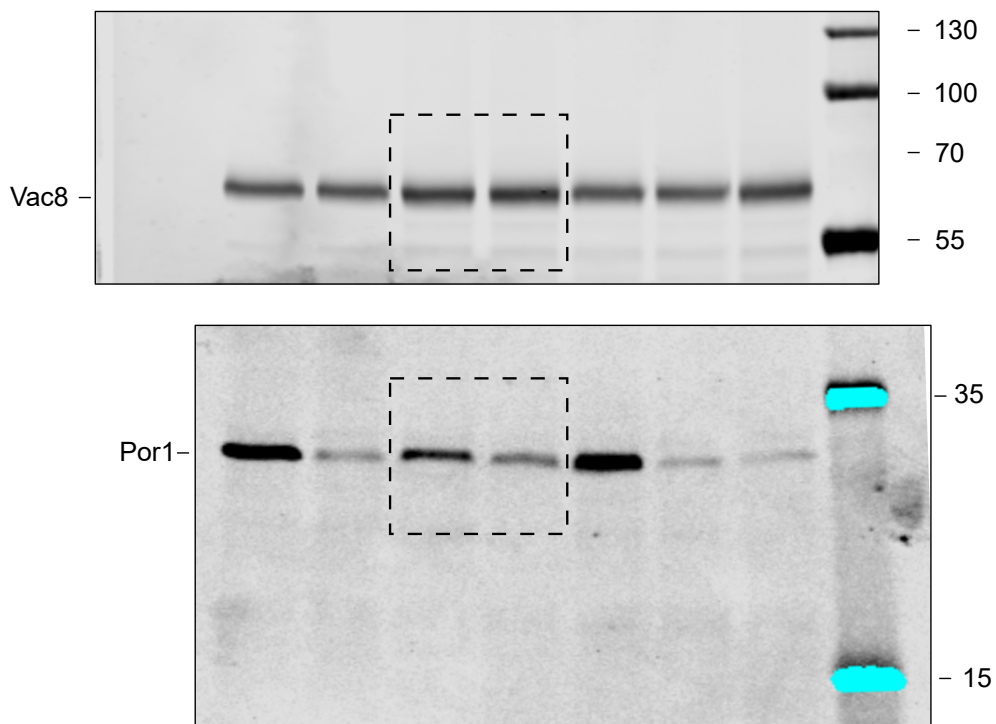

Supplement: JCB_202103048_SourceDataF2.pdf [file JCB_202103048_SourceDataF2.pdf]
