# Supplementary figures and images for: Cvm1 is a component of multiple vacuolar contact sites required for sphingolipid homeostasis
Source: PubMed Central journal article supplement — J Cell Biol. 2022 Jun 29;221(8):e202103048. doi: 10.1083/jcb.202103048 (PMC9247719; doi:10.1083/jcb.202103048), 2022-06-29

Source Data - Figure 3

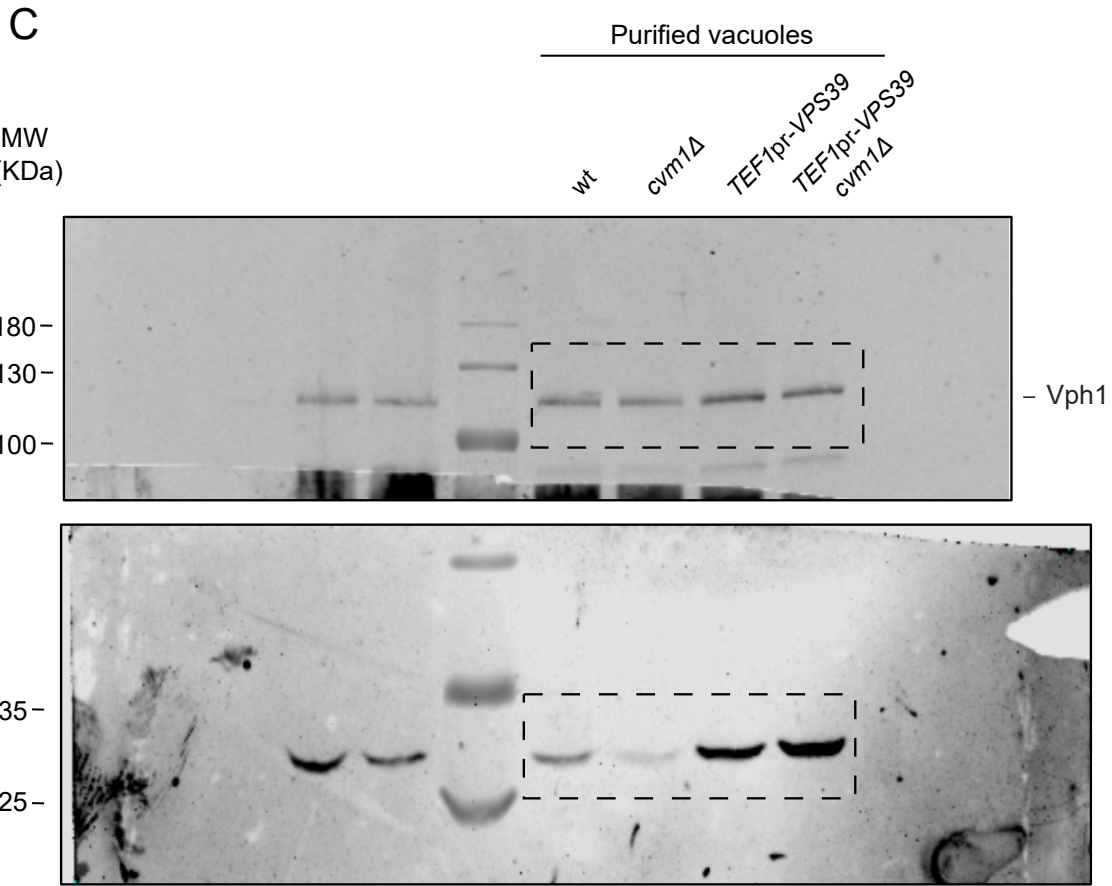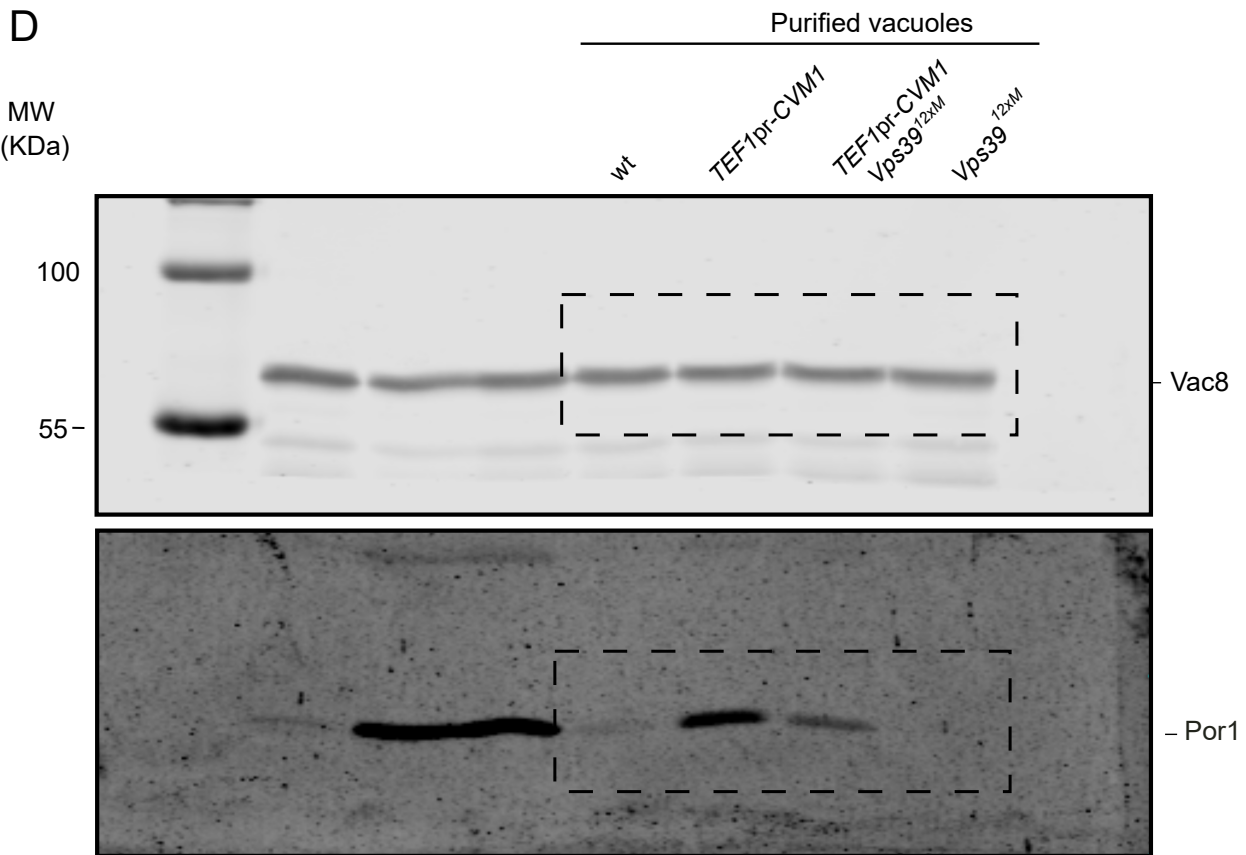

Supplement: JCB_202103048_SourceDataF3.pdf [file JCB_202103048_SourceDataF3.pdf]

D

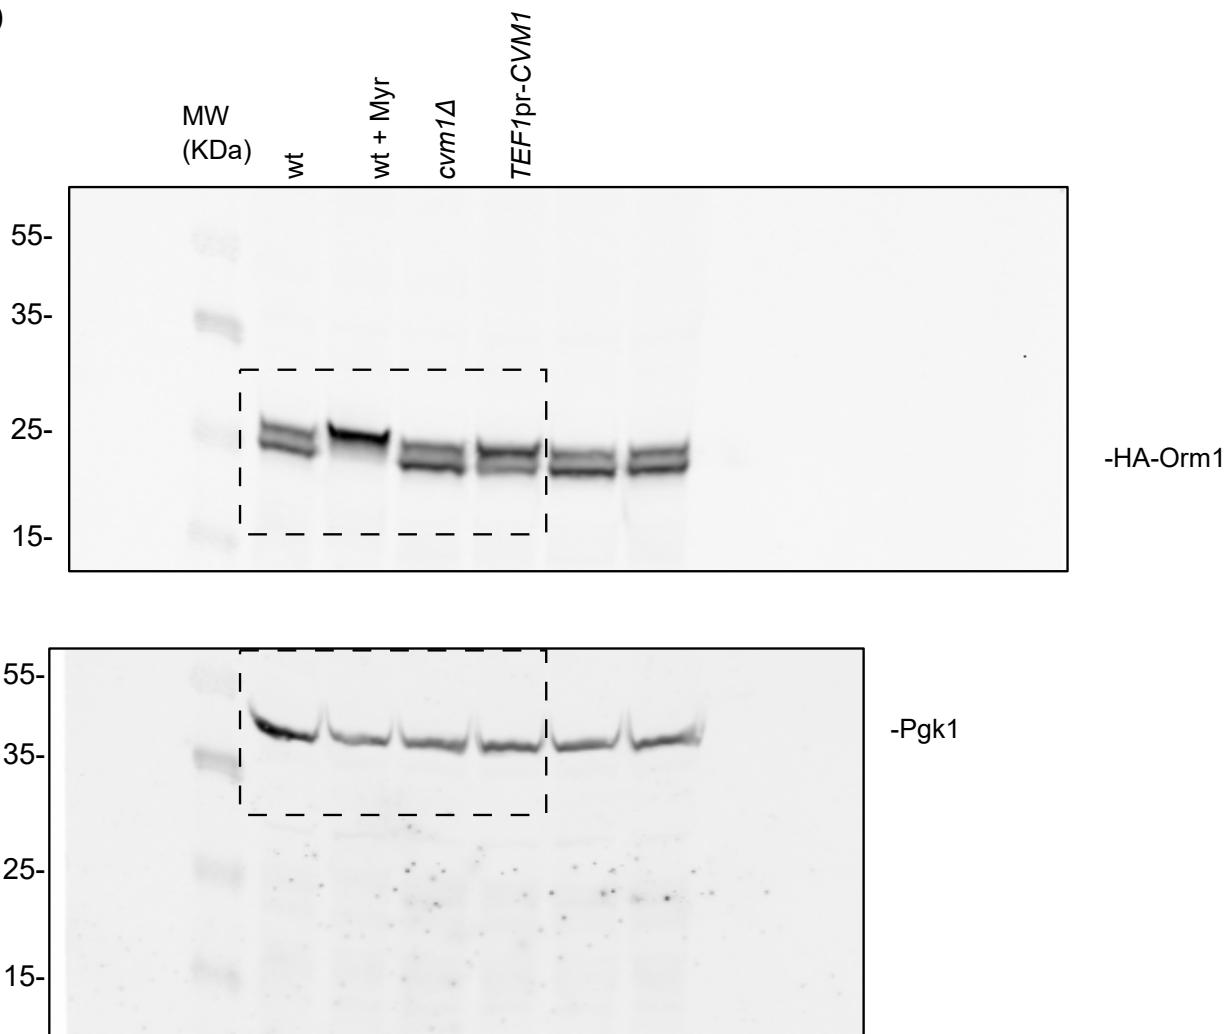

Supplement: JCB_202103048_SourceDataF7.pdf [file JCB_202103048_SourceDataF7.pdf]

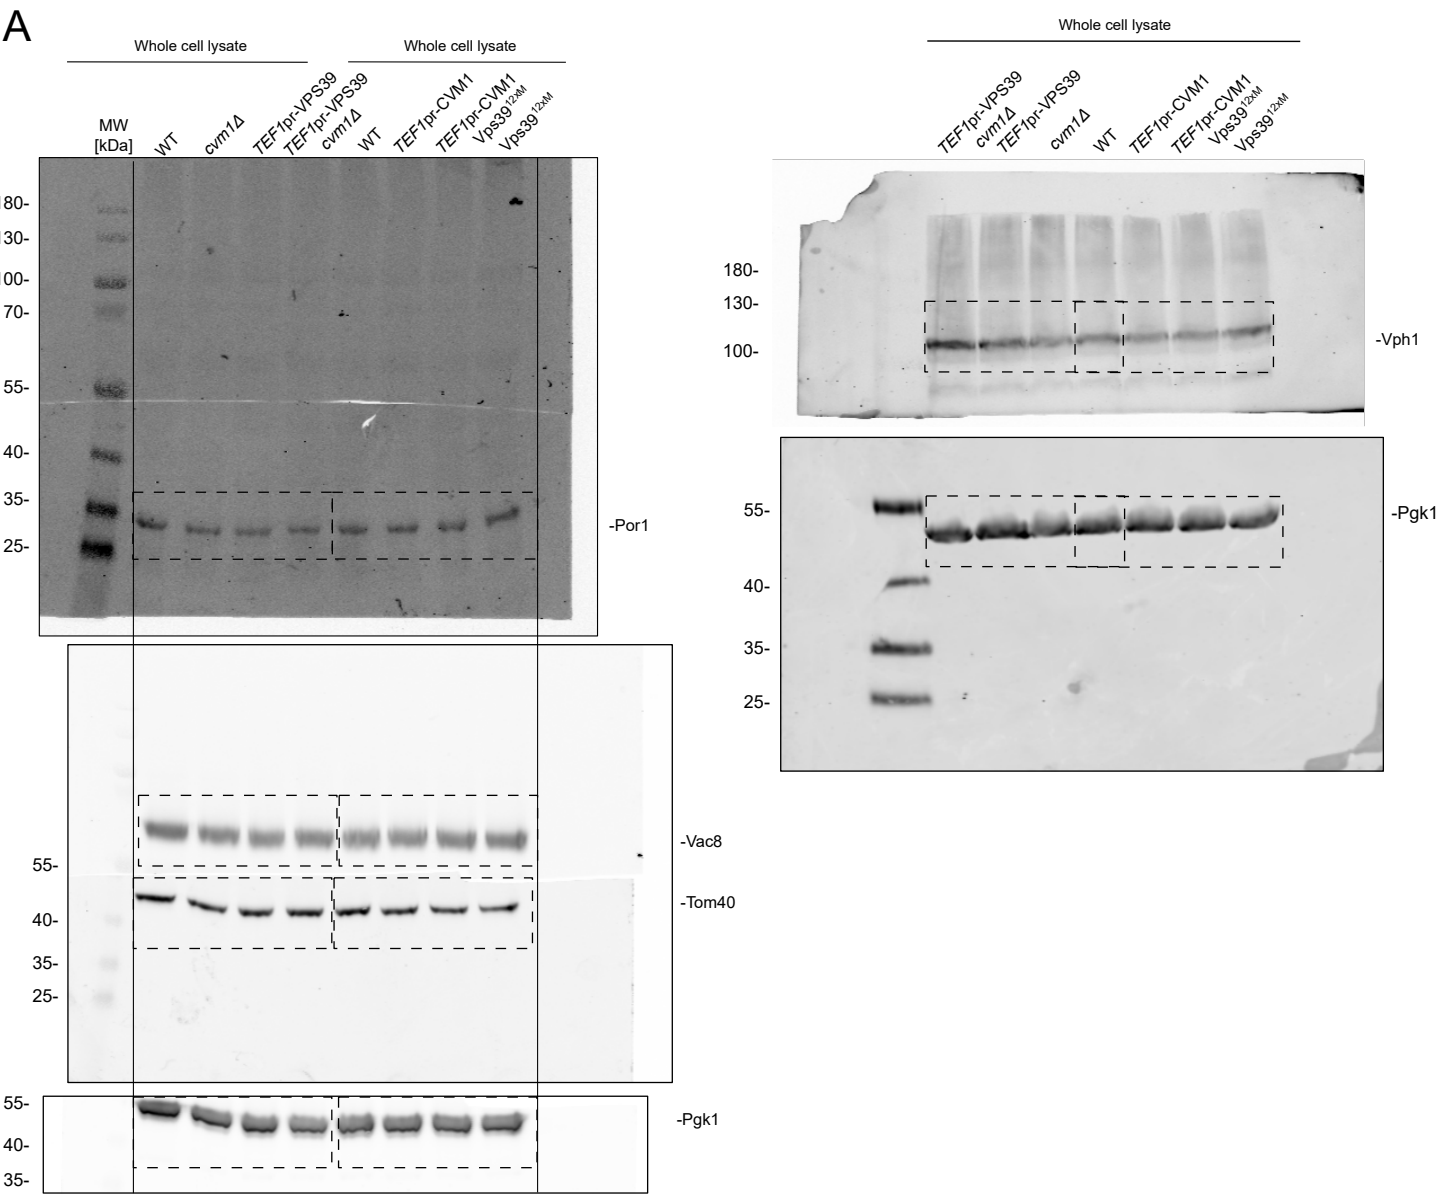

Supplement: JCB_202103048_SourceDataFS2.pdf [file JCB_202103048_SourceDataFS2.pdf]

D

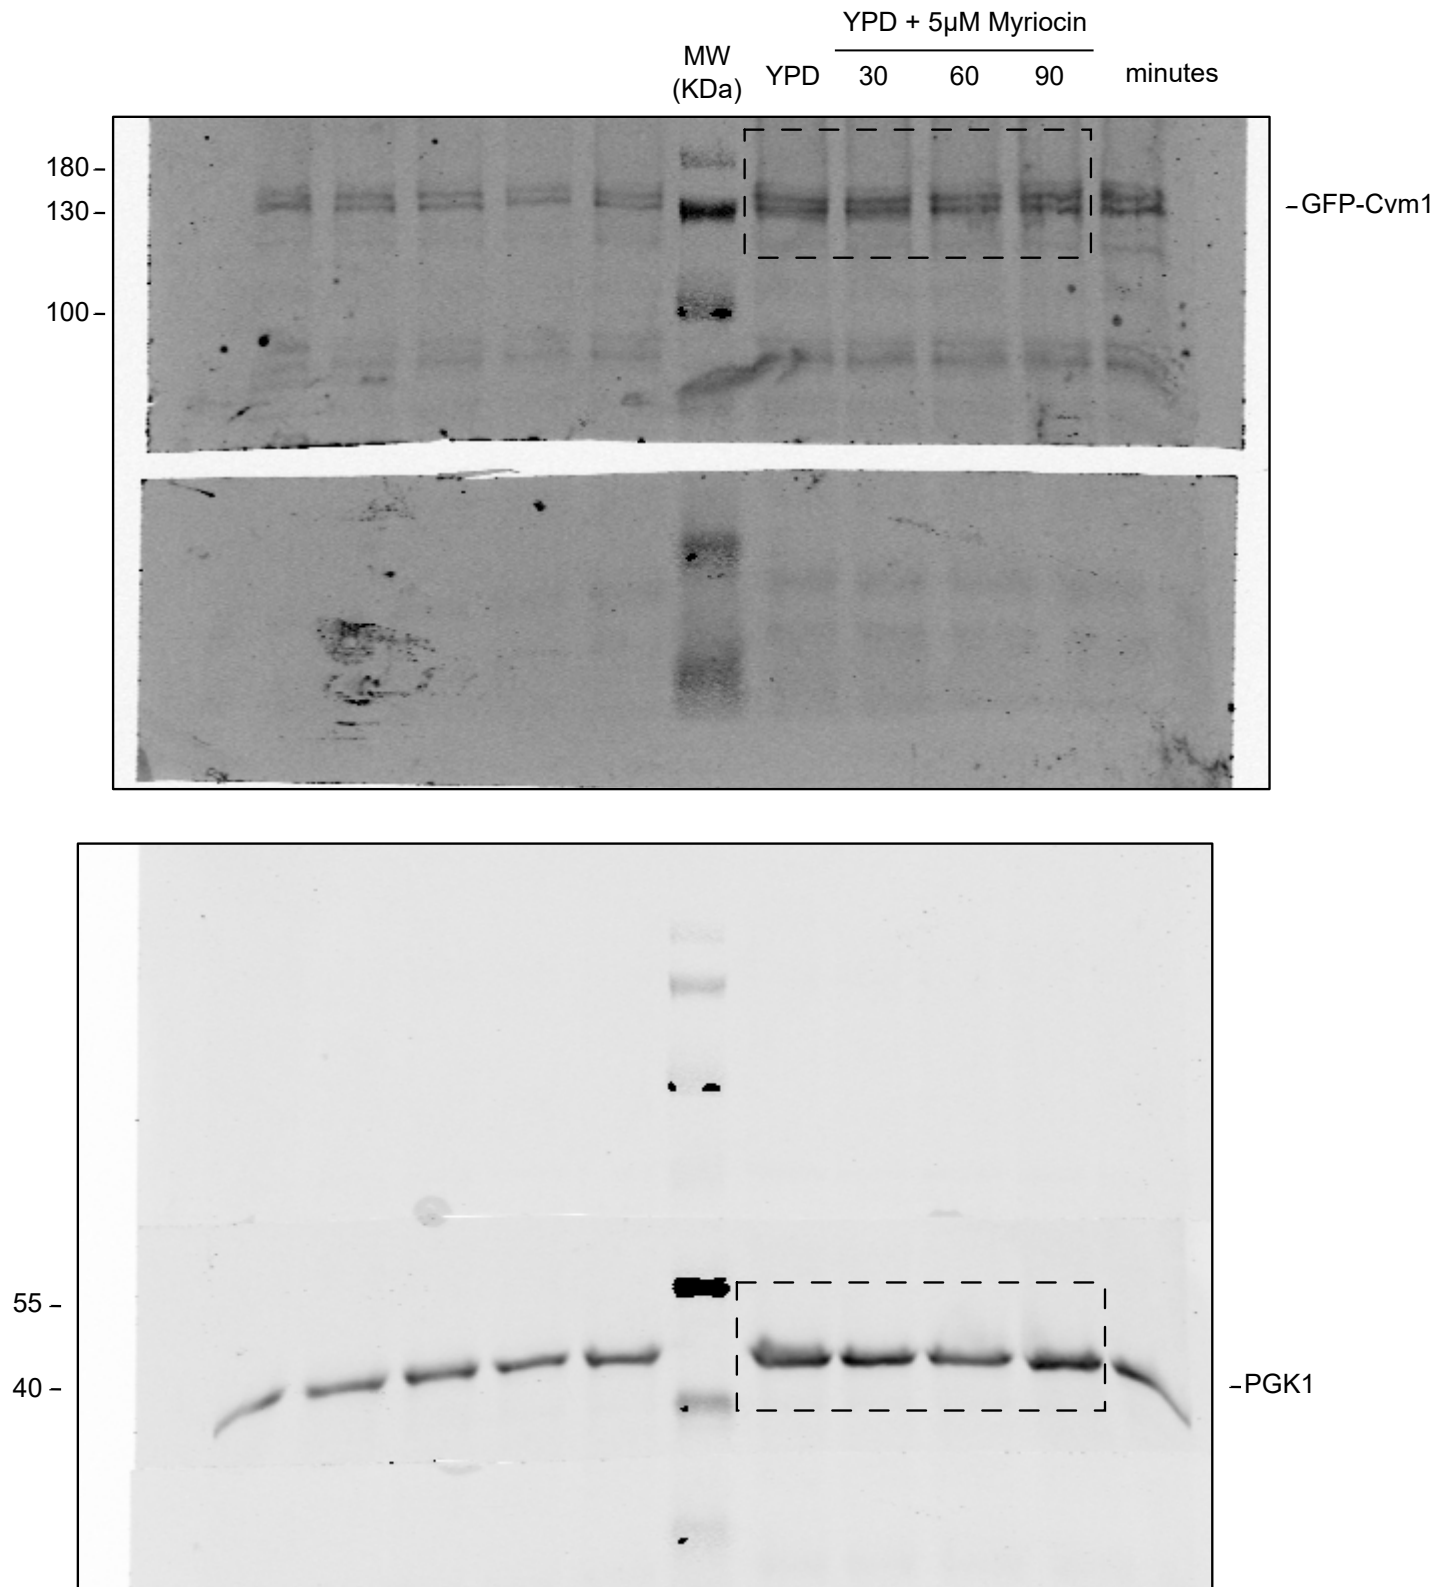

Supplement: JCB_202103048_SourceDataFS5.pdf [file JCB_202103048_SourceDataFS5.pdf]
